# Supplementary material for: Cytotoxicity and antimicrobial action of selected phytochemicals against planktonic and sessile Streptococcus mutans
Source: PeerJ. 2018 Jun 4;6:e4872. doi: 10.7717/peerj.4872 (PMC5991298; doi:10.7717/peerj.4872)
Supplement: Data S1 [file peerj-06-4872-s001.xlsx]

## Sheet: Data_planktonic bacteria
	Phytochemical	Experiment	MBC
	Eugenol	1	10 mM
		2	10 mM
		3	10 mM
	Cinnamic acid	1	3 mM
		2	5 mM
		3	5 mM
	Trans-cinnamaldehyde	1	10 mM
		2	13 mM
		3	10 mM
	Sabinene hydrate	1	10 mM
		2	10 mM
		3	10 mM
	Citronellol	1	3 mM
		2	3 mM
		3	3 mM
	Terpineol	1	13 mM
		2	13 mM
		3	13 mM
	Limonene	1	X
		2	X
		3	X

## Sheet: Data_sessile bacteria
											11	12
											Control	0	540/35,590/35
	1	4	5	6	7	8	9	10			14047	3	540/35,590/35
A		DMSO (control)	Cinnamic acid	Trans-cinnamaldehyde	Citronellol	Sabinene hydrate	Eugenol	Terpineol			14171	7	540/35,590/35
MBC			5 mM	13 mM	3 mM	10 mM	10 mM	15 mM			14398	7	540/35,590/35
											11336	10	540/35,590/35
B		10055	4345	4197	5050	9615	9725	7996			11800	12	540/35,590/35
C		8206	3366	4800	4870	8858	7862	7056			10823	15	540/35,590/35
D		9967	3199	4853	4424	6609	8120	7327			17	8	540/35,590/35
E		7782	3461	4173	5246	7317	7932	6098
F
G
H
	Average	9002.5	3592.75	4505.75	4897.5	8099.75	8409.75	7119.25
	Standard deviation (SD)	1177.86	513.06	371.131	351.03	1379.13	883.575	787.147
		Average	SD
	DMSO	9002.5	1177.86
	Citronellol	4897.5	411.496
	Trans-cinnamaldehyde	4505.75	371.131
	Sabinene hydrate	8099.75	1379.13
	Eugenol	8409.75	883.575
	Terpineol	7119.25	787.147
	Cinnamic acid	3592.75	513.06

## Sheet: Data_fibroblast cells
User: USER
Path: C:\Program Files (x86)\BMG\Omega\User\Data\
Test ID: 1672
ID1: Resazurina
Fluorescence (FI)
	Raw Data (520-10/600-10)
	DMSO	Citronellol	Trans-cinnamaldehyde	Eugenol	Cinnamic acid
	1932	1764	1437	1663	1664
	1866	1634	1317	1722	1641
	1869	1657	1402	1732	1962
	1956	1606	1358	1695	1915
Average	1905.75	1665.25	1378.5	1703	1795.5
Standard deviation (SD)	45.2576	69.0573	52.2079	30.9085	166.498
		Average	SD	adhesion as percentage of the control	inhibition as percentage of the control	SD as percentage of the control
	DMSO (control)	1905.75	45.2576	100	0	3.35846
	Citronellol	1665.25	69.0573	87.3803	12.6197	4.7788
	Trans-cinnamaldehyde	1378.5	52.2079	72.3337	27.6663	4.47027
	Eugenol	1703	30.9085	89.3611	10.6389	2.98892
	Cinnamic acid	1795.5	166.498	94.2149	5.78512	9.57234
		adhesion as percentage of the control	SD as percentage of the control
	DMSO	100	3.35846
	Citronellol	87.3803	4.7788
	Trans-cinnamaldehyde	72.3337	4.47027
	Eugenol	89.3611	2.98892
	Cinnamic acid	94.2149	9.57234
